# Supplementary material for: Thrombin-initiated platelet activation in vivo is vWF independent during thrombus formation in a laser injury model
Source: JCI journal article supplement (doi:10.1172/jci30537), 2007-03-22
Supplement: sd1 [file 1]

### **Supplementary Legend to Figure**

Figure S1. A calibration curve was established in an *in vitro* experiment using Fura 2-loaded platelets. Fura 2-loaded platelets were split into two equal amounts. One aliquot was also loaded with BAPTA, which chelates calcium ions and poisons the ability for the platelets to mobilize calcium. The two aliquots, Fura 2-loaded platelets and fura 2-loaded platelets containing BAPTA, were mixed in various ratios to generate a calibration curve from 0% calcium mobilization (0% fura 2-loaded platelets and 100% fura 2-loaded platelets containing BAPTA) to 100% calcium mobilization (100% fura 2-loaded platelets and 0% fura 2-loaded platelets containing BAPTA) following thrombin (1 U/ml) activation. Calcium mobilization fluorescence at 340 nm was divided by the total platelet fluorescence at 380 nm as a function of the ratio of the two preparations of platelets. The % of platelets capable of undergoing calcium mobilization, defined on the x axis, was plotted against the experimentally determined fluorescence intensity associated with calcium mobilization divided by the fluorescence intensity of the total platelets, on the y axis.

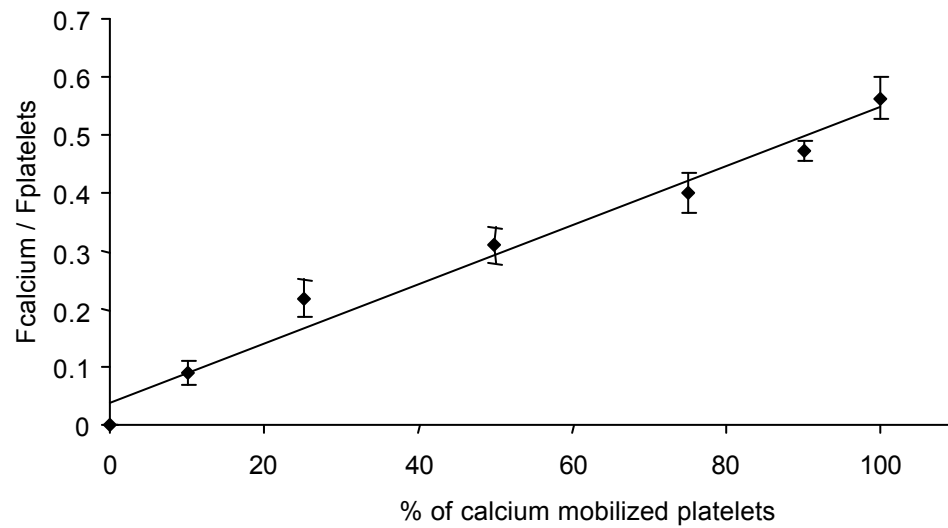

Figure S1
